# Supplementary material
Source: Copernicus journal article supplement (doi:10.5194/egusphere-2026-2530)
Supplement: Supplementary file 1 [file egusphere-2026-2530-supplement.pdf]

# Supplement

The figures are shown in this file as follows:

Figure S1. RMW-height frequency diagram of rain particles.

Figure S2. Same as Fig. 10, but all data within a 300 km radius are used to perform statistics for K21 and T24

Figure S3. Same as Fig. 11, but all data within a 300 km radius are used to perform statistics for K21 and T24

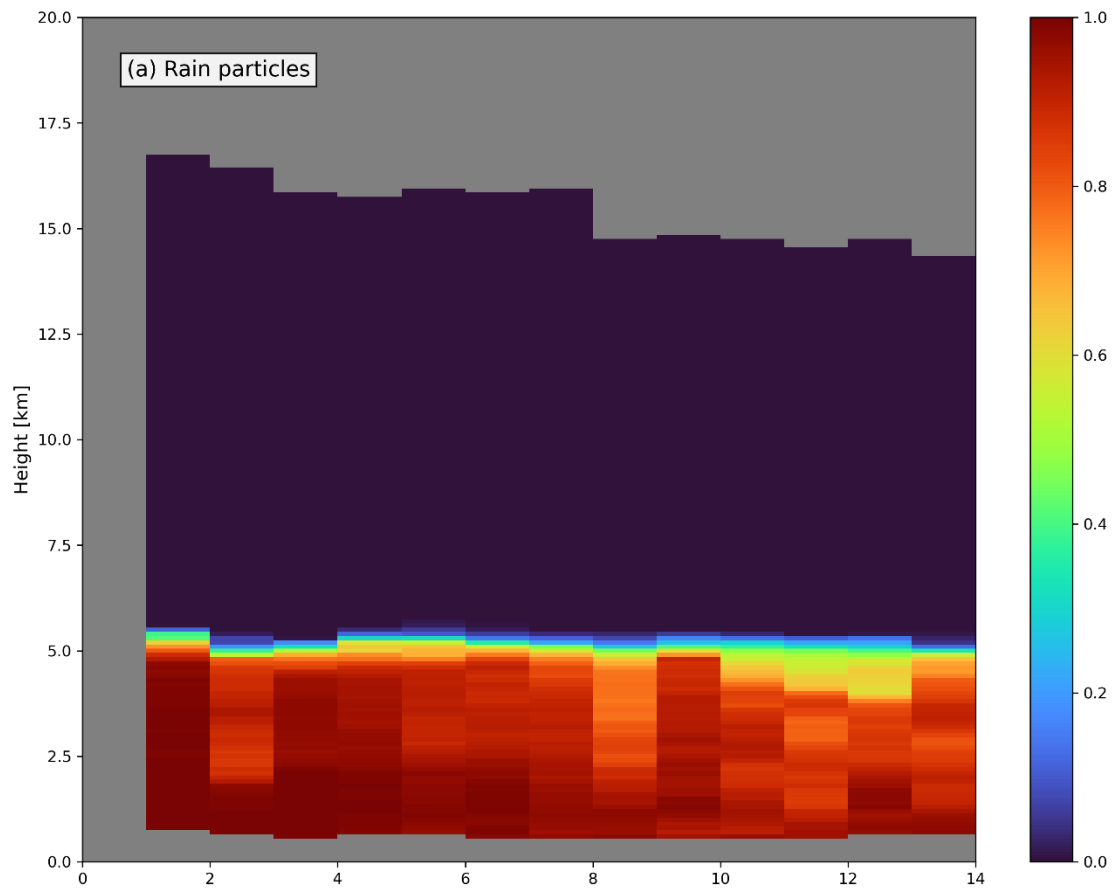

Figure S1. RMW-height frequency diagram of rain particles.

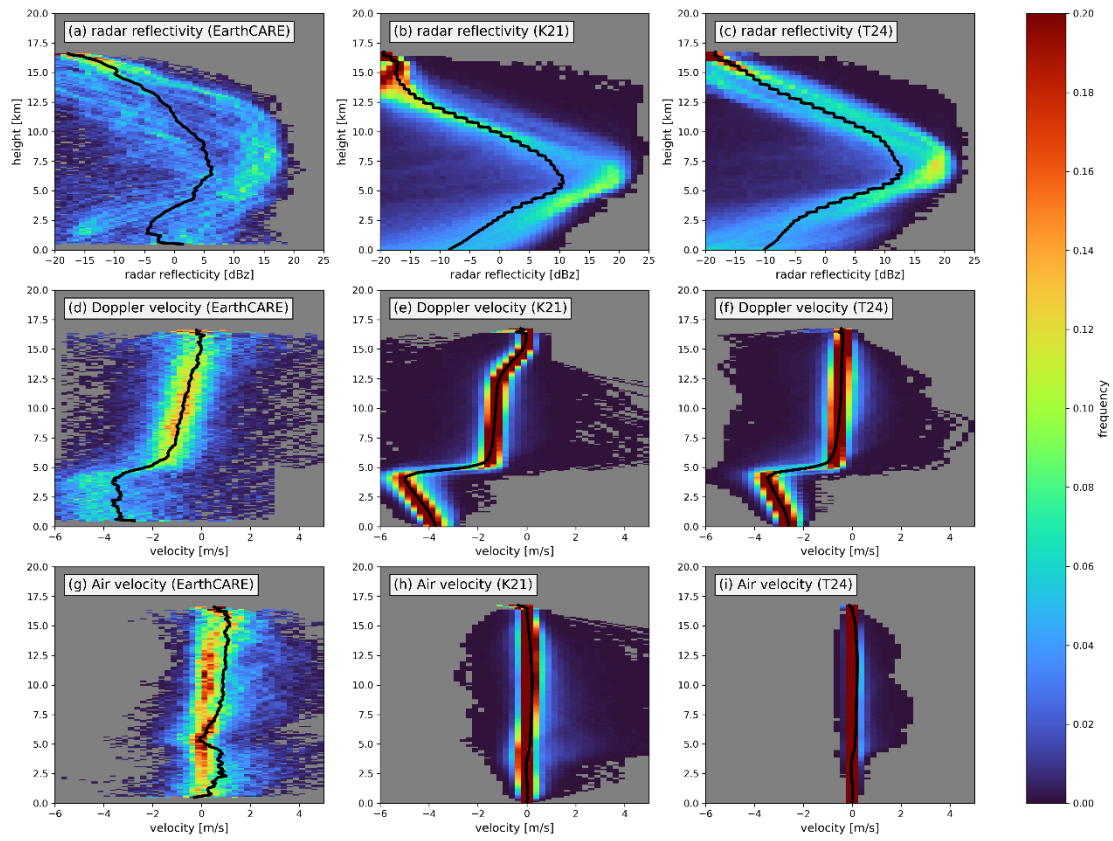

Figure S2. Same as Fig. 10, but all data within a 300 km radius are used to perform statistics for K21 and T24

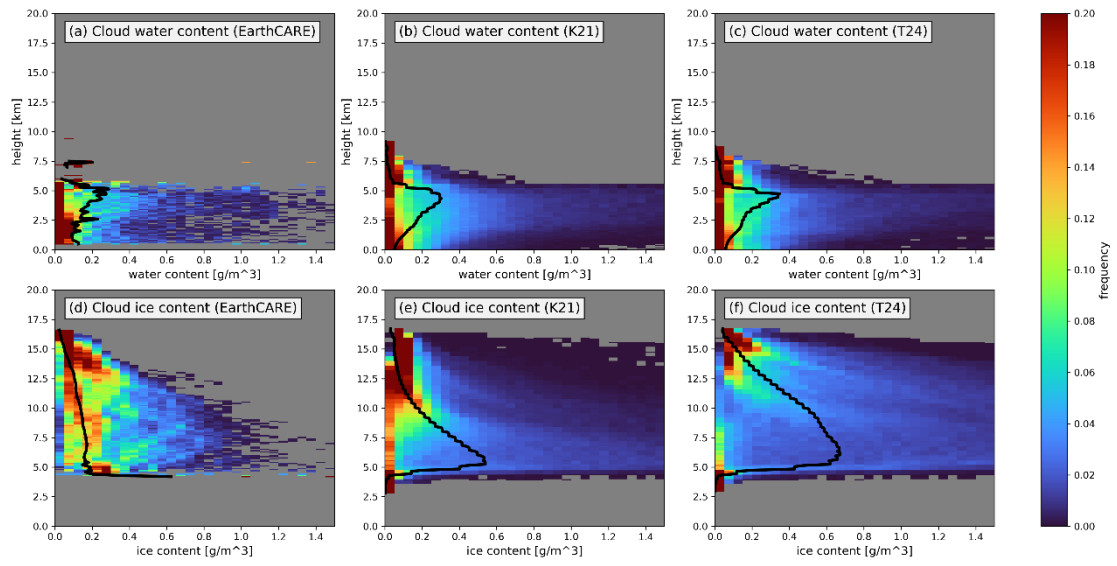

Figure S3. Same as Fig. 11, but all data within a 300 km radius are used to perform statistics for K21 and T24
